# Supplementary material for: Genome-wide survey and expression analysis of the bHLH-PAS genes in the amphioxus Branchiostoma floridae reveal both conserved and diverged expression patterns between cephalochordates and vertebrates
Source: PubMed Central journal article supplement (PMC4066832; doi:10.1186/2041-9139-5-20), 2014-06-03

# A. bHLH

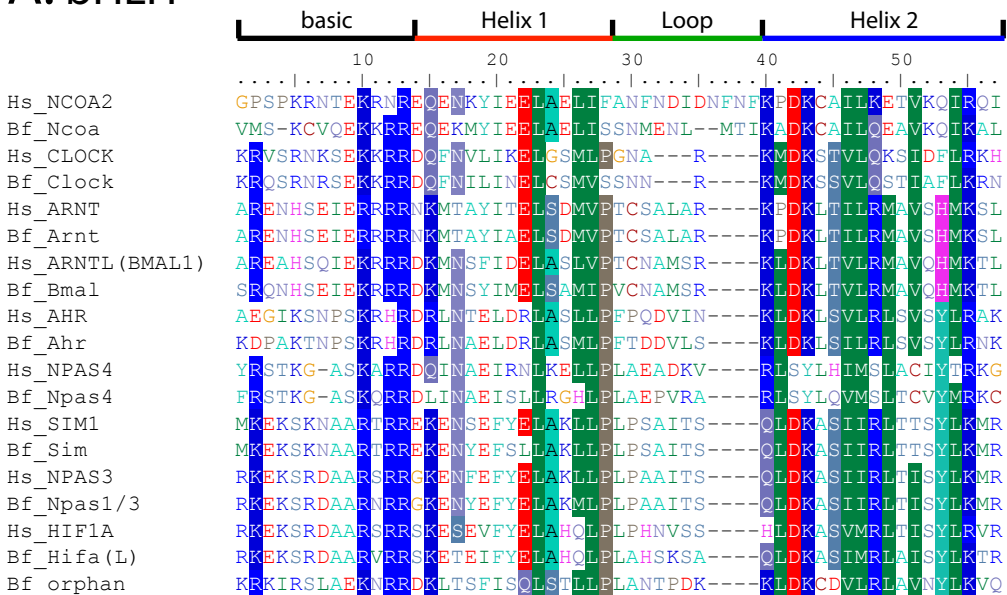

# B. PAS A

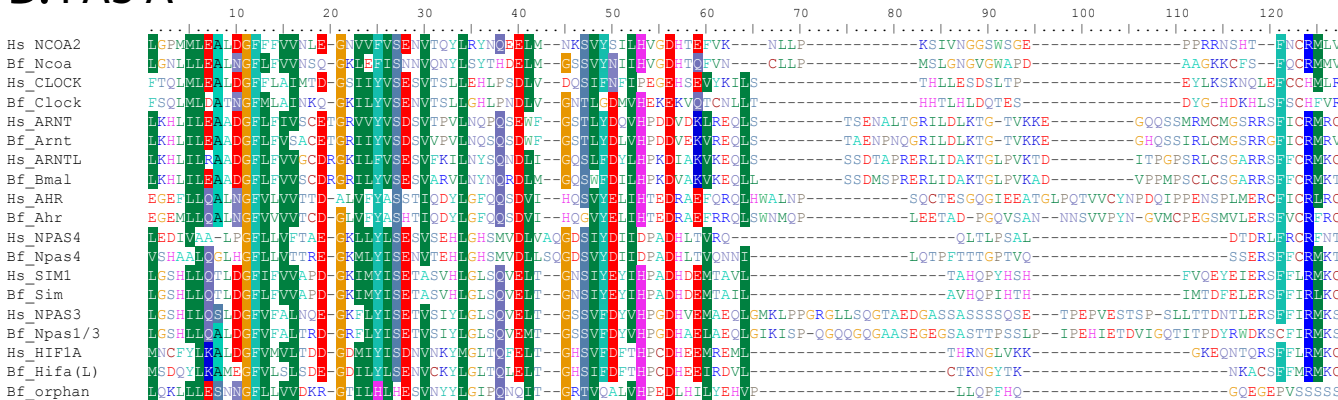

# C. PAS B

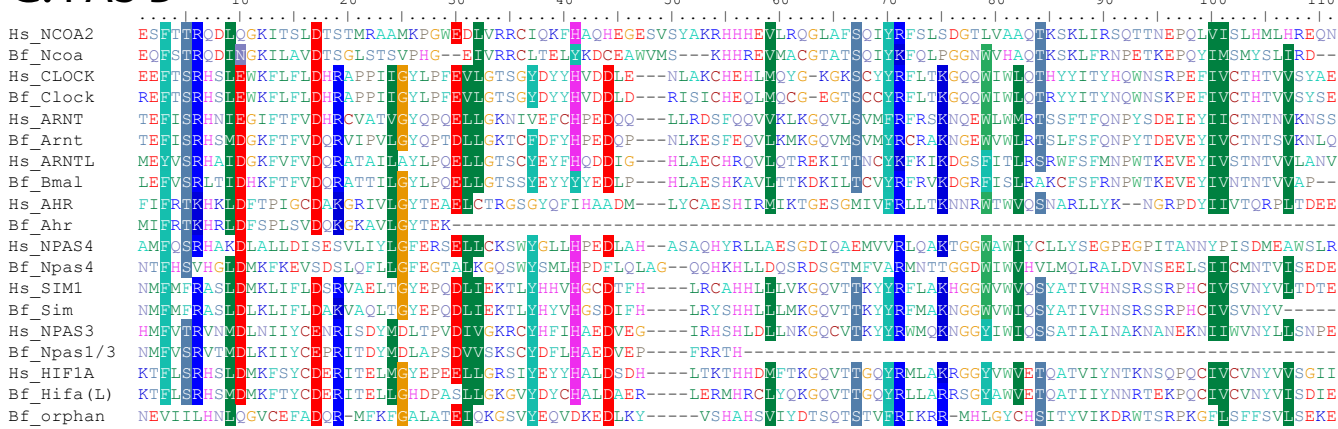

Supplement: 2041-9139-5-20-S4.pdf [file 2041-9139-5-20-S4.pdf]
