# Supplementary material for: Genome-wide survey and expression analysis of the bHLH-PAS genes in the amphioxus Branchiostoma floridae reveal both conserved and diverged expression patterns between cephalochordates and vertebrates
Source: PubMed Central journal article supplement (PMC4066832; doi:10.1186/2041-9139-5-20), 2014-06-03
Supplement: 2041-9139-5-20-S5.pdf [file 2041-9139-5-20-S5.pdf]

### Proline hydroxylation site 1 in the ODDD

Bf Hifa(L) GFFWDGEQALRDSPEDLTRVAPAAAGDAMIPLGFPSADVLFSSSLPDTST  
 Bf Hifa(s) GFFWDGEQ-----DVLFG-SSLPDTST  
 Hs HIF1A SLFDK----LKKEPDALILLAPAAAGDTIISLDFGSDNDETDDQQLEEV  
 Mm Hif1a CLFDK----LKKEPDALILLAPAAAGDTIISLDFGSDDETETEDQQLEDV  
 Xl Hif1a CLFDK----LKQEPESLTVLAPDAGDEIIPLDFSSGD---SDKPYEDV  
 Dr Hif1a TLYNK----LKEEPEALTVLAPAAAGDAIISLDFNNSDS--DIQLLKEV  
 Sp Hif1 PLYLAGCNSSQAVEEKLAYLAPTAGDVMIEILDPSDSQRMDLTSEFKEFN  
 Tc Hif1a SDEEPGLTMLKDEPDDLTHLAPVAGDVCVPLDDHPPFLTDKMLDDFLLRD  
 Pp Hif1a PEDQPYGVBLKDEPDDLTHLAPSGGDTCPLEVPVIFKPELDDVFTQI--

### Proline hydroxylation site 2 in the ODDD

Bf Hifa(L) PSLALDTGQPIQNNIRTKAAGKLTKRPLTAEELSYRAPYIPAYQMLNPPNNAVLASLLETDRRQSVTSSRSY  
 Bf Hifa(s) PSLALDTGQPIQNNIRTTAAGKLTKRPLTAEELSYRAPYIPAYQMLNPPNNAVLASLLETDRRQSVTSSRSY  
 Hs HIF1A KLFAEDT--EAKNPFSTQDT-----DLDLEMLAPYIPM-----DDDFQLRSFDQLSPLESSASPE  
 Mm Hif1a KLFAEDT--EAKNPFSTQDT-----DLDLEMLAPYIPM-----DDDFQLRSFDQLSPLENSPSPPS  
 Xl Hif1a KLFAIDT--EAKAPFTTQET-----DLDLEMLAPYIPM-----DDDFQLRTFDQLSSLECDSSIPQT  
 Dr Hif1a KLFAIDT--EAKTPFSTQPM-----EDLDLEMLAPYIPM-----DDDFQLRIPSPLDPLPSATHSVSA  
 Sp Hif1 -----DELAMRAPYIPM-----GEDFDLSTDPILGMDPFTSETWM  
 Tc Hif1a DSLSDED---RLSTFMNLHTE-----DESDLVAKAPYITMN----MGDDLPLLMSDDLMWSSSEKSRASP  
 Pp Hif1a NETAHESYVNIELKVENQND-----LDEFDMRAPFIPL-----SNELMLLNQDDL MWGAQPD SLPMG

### The CTAD, highlighting asparagine hydroxylation site

Bf Hifa(L) DLDDDF-----LPPLTRADVEVNAPIQ-TYKLLQGNDLMSALDQSAALF  
 Bf Hifa(s) ALDDDF-----LPPLTRADVEVNAPIQ-TYKLLQGNDLMSALDQSAALF  
 Hs HIF1A SMDESG-----LPQLTSYDCEVNAPIQGSRNLLQGEELLRALDQVN---  
 Mm Hif1a SMDESG-----LPQLTSYDCEVNAPIQGSRNLLQGEELLRALDQVN---  
 Xl Hif1a SFDGTV-----LPQLTGYDCEVNAPVHGTRNLLQGEELLRALDQAN---  
 Dr Hif1a SLEGGSG-----LPQLTRYDCEVNAPVQDRHLLQGEELLRALDQVN---  
 Sp Hif1 MPLGAV-----LPILITNLDAEVNAPLPNTNRLLQGEDLLQALDLTAPY-  
 Tc Hif1a LSLLDPDATIPSLLDLTQQDFEVNAPVN-S-LLLQGTDLLTALDINGPI-  
 Pp Hif1a LLLVDPDLTIPSLSELSQLDFEVNAPAN-IGNLLQGADLLMALDQA----
